# Supplementary material for: Responsive fluorescent core-crosslinked polymer particles based on the anthracene-containing hyperbranched poly(ether amine) (hPEA–AN)
Source: Royal Society of Chemistry journal article supplement (doi:10.1039/c1sm05537b), 2011-01-01
Supplement: c1sm05537b.pdf [file c1sm05537b.pdf]

*Supporting Information*

**Responsive Fluorescent Core-crosslinked Polymer particles Based on the Anthracene-Contained Hyperbranched Poly(ether amine) (hPEA-AN)**

**Bing Yu, Xuesong Jiang\*, Jie Yin**

School of Chemistry & Chemical Technology, State Key Laboratory for Metal

Matrix Composite Materials, Shanghai Jiao Tong University

Tel.: +86-21-54743268; Fax: +86-21-54747445. E-mail: [ponygle@sjtu.edu.cn](mailto:ponygle@sjtu.edu.cn),

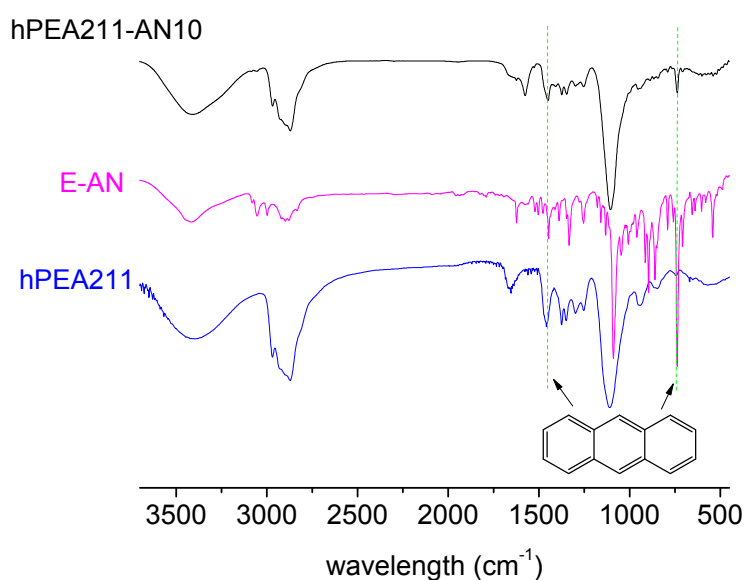

**Figure S1.** FT-IR spectra of hPEA211, E-AN, and hPEA211-AN10

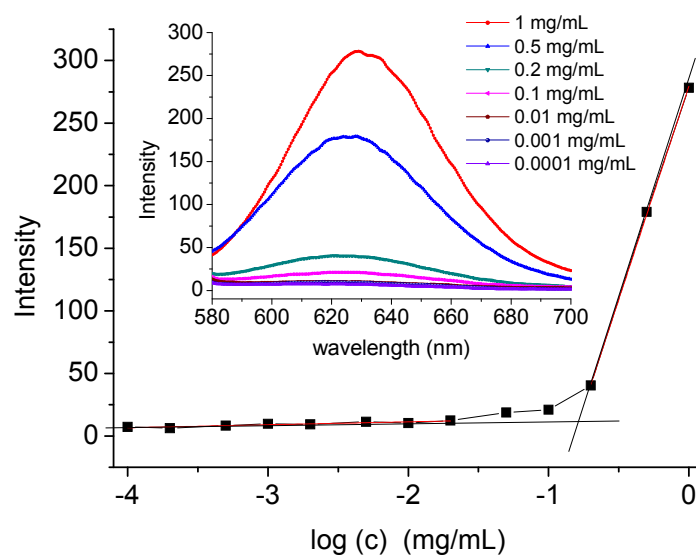

**Figure S2.** Plot of the maximum fluorescence emission intensity of the Nile Red vs concentration of hPEA211-AN10. Inset: fluorescence emission spectra of Nile Red solution with different hPEA211-AN10 concentration.

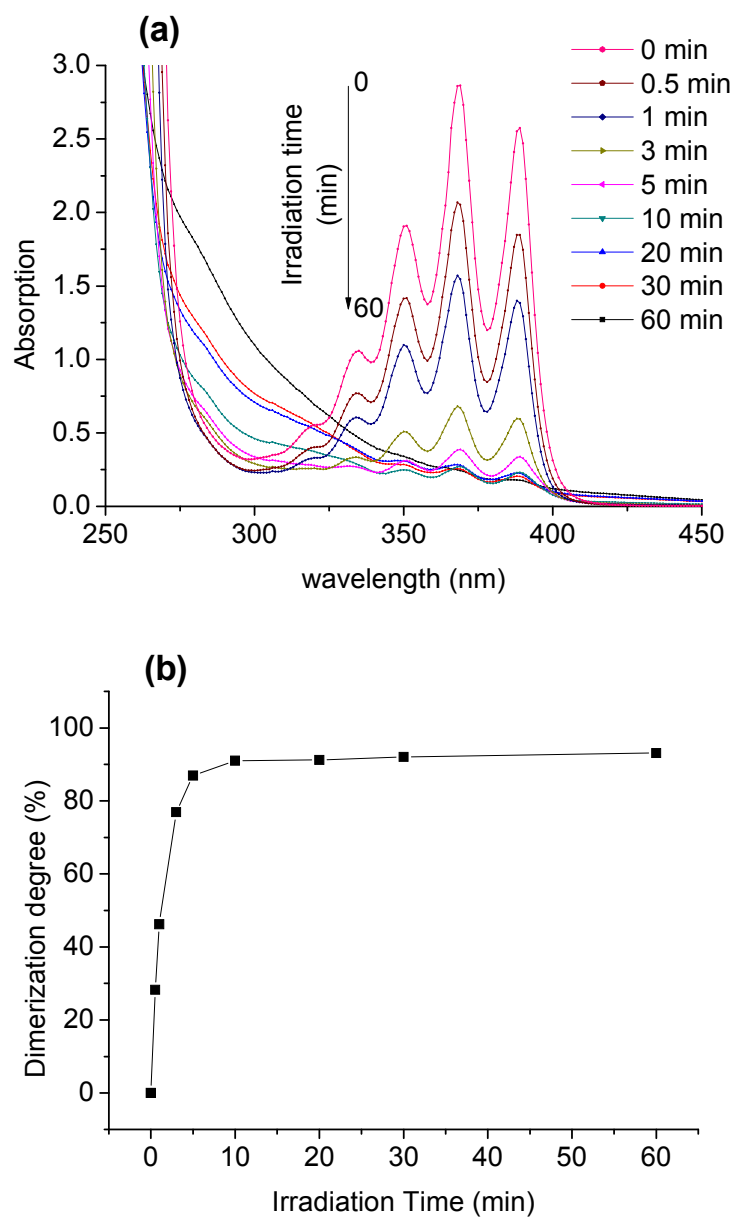

**Figure S3.** (a) Dependence of UV-vis spectra of hPEA211-AN10 particles aqueous solution (1 mg/mL) on UV irradiation (365 nm) time. (b) Increase of dimerization degree of hPEA211-AN10 particles aqueous solution (1 mg/mL) during the photo-crosslinking vs the irradiation time.

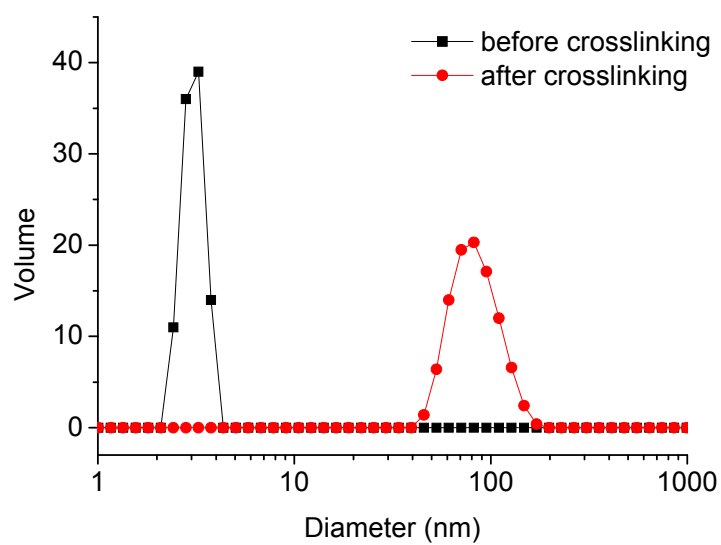

**Figure S4.** Size distribution of particles formed by hPEA211-AN10 before and after crosslinking determined by DLS at 25 °C in THF.

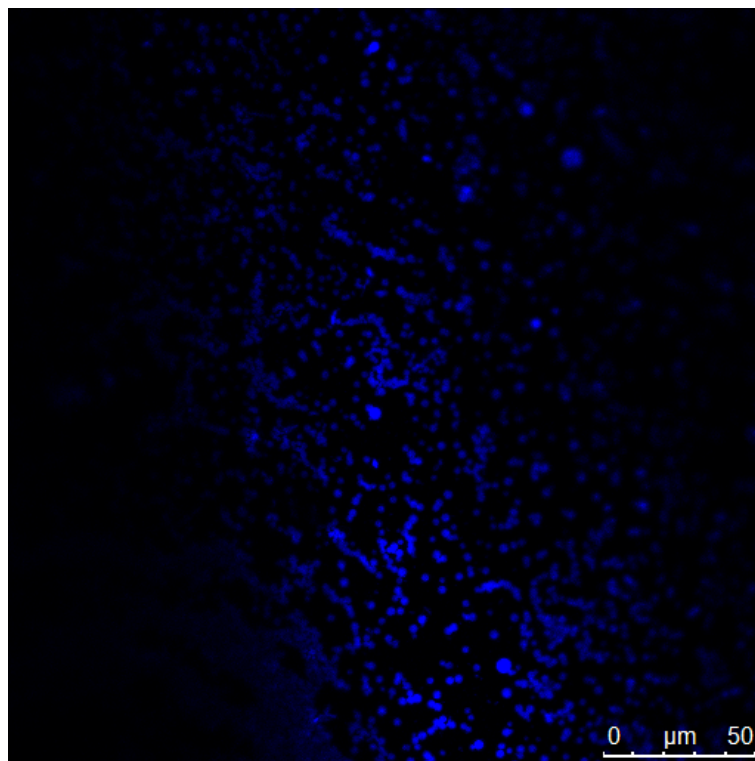

**Figure S5.** Confocal microscope image of hPEA541-AN particles at room temperature with an excitation wavelength 405 nm. The particles were exposed at 365 nm UV-light for 5 min.

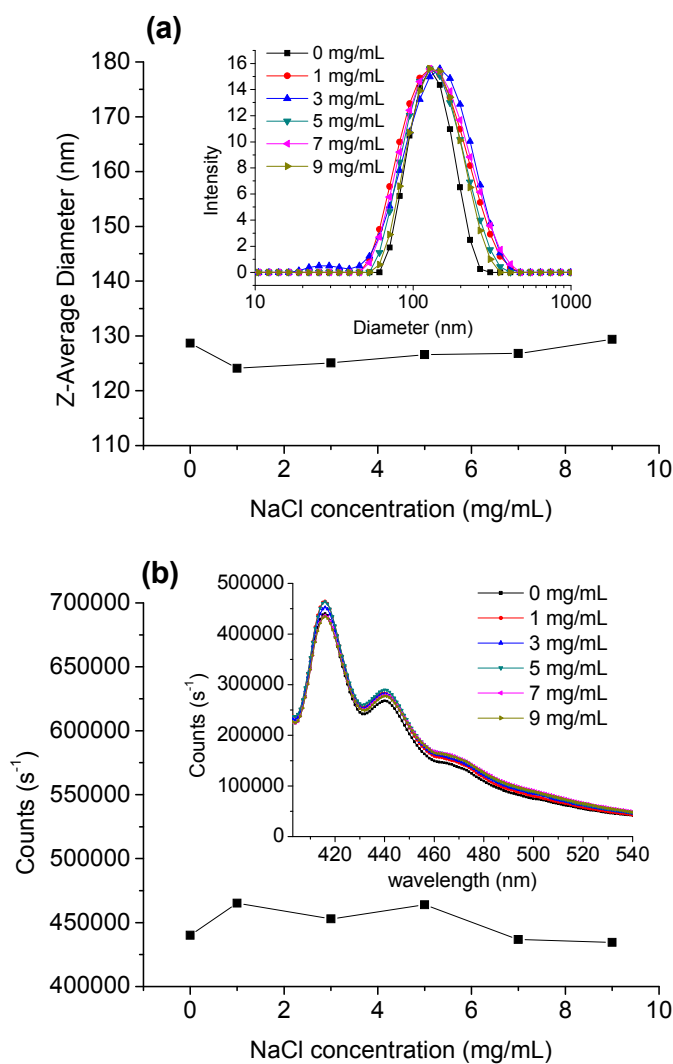

**Figure S6.** (a) Z-average diameters of particles formed by hPEA211-AN10, with different NaCl concentration obtained by DLS. Inset: Size distribution of particles formed by hPEA211-AN10 with different NaCl concentration determined by DLS at 25 °C in aqueous solution. (b) Plot of the fluorescence emission intensity of hPEA211-AN10 at 416 nm vs NaCl concentration. Inset: Fluorescence emission spectra of hPEA211-AN10 particles solution with different NaCl concentration.

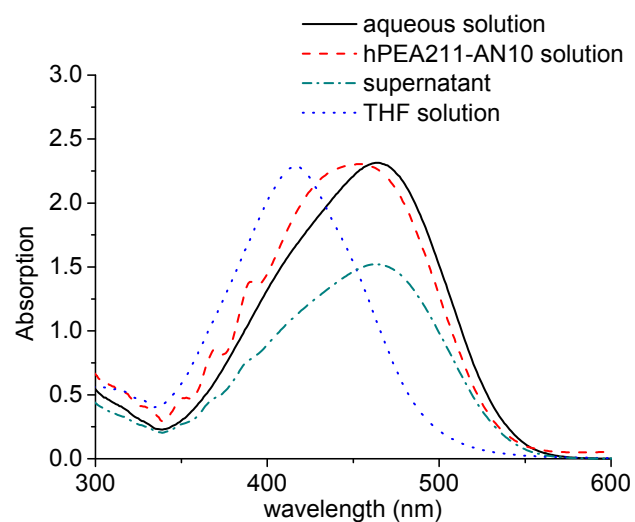

**Figure S7.** UV-vis spectra of Methyl Orange (MO) solution in encapsulation experiment ( $c_{\text{hPEA211-AN10}} = 10 \text{ mg/mL}$ ,  $c_{\text{dye}} = 1 \text{ mg/mL}$ ). The solution was diluted by 20 times before measurement.

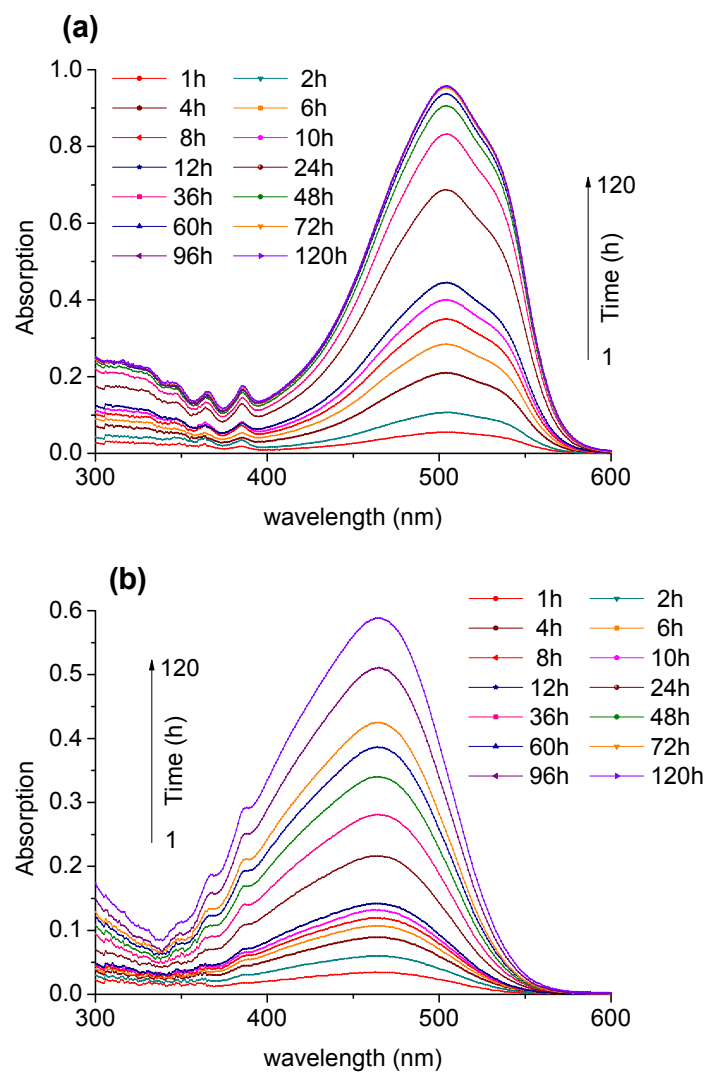

**Figure S8.** UV-vis spectra of the solution of Methyl Orange released from hPEA211-AN10 particles in (a) pH 3.0 and (b) pH 8.0 citrate buffered aqueous solution within different time.
